# Supplementary material
Source: Copernicus journal article supplement (doi:10.5194/egusphere-2026-1929)
Supplement: Supplementary file [file RC4_S1.pdf › RC4/RC4_S1.pdf]

Historical Google Earth imagery provides unambiguous evidence of substantial fill placement, manifested in our dataset as fresh post-construction settlement superimposed on the longer-term Young Bay Mud consolidation signal.

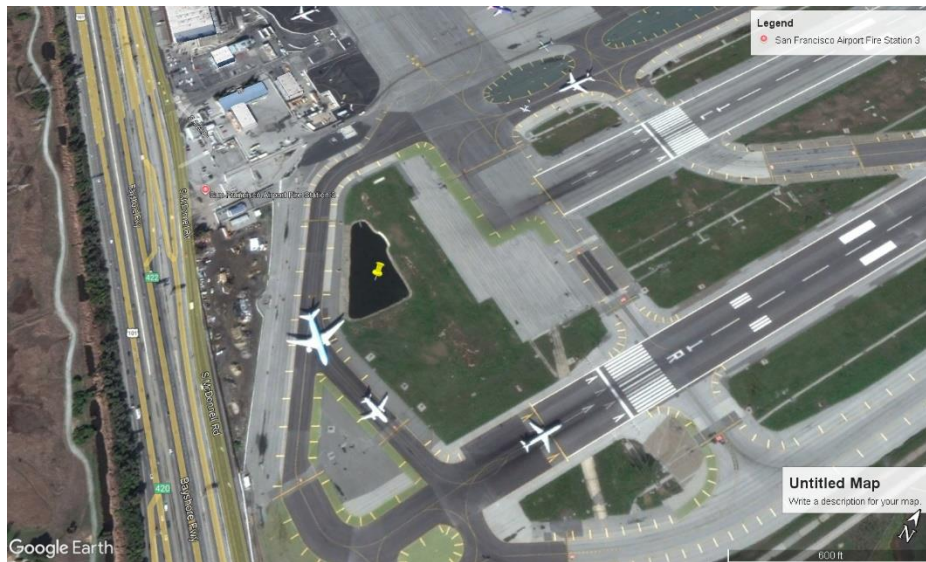

Runway 1L end – Year 2012

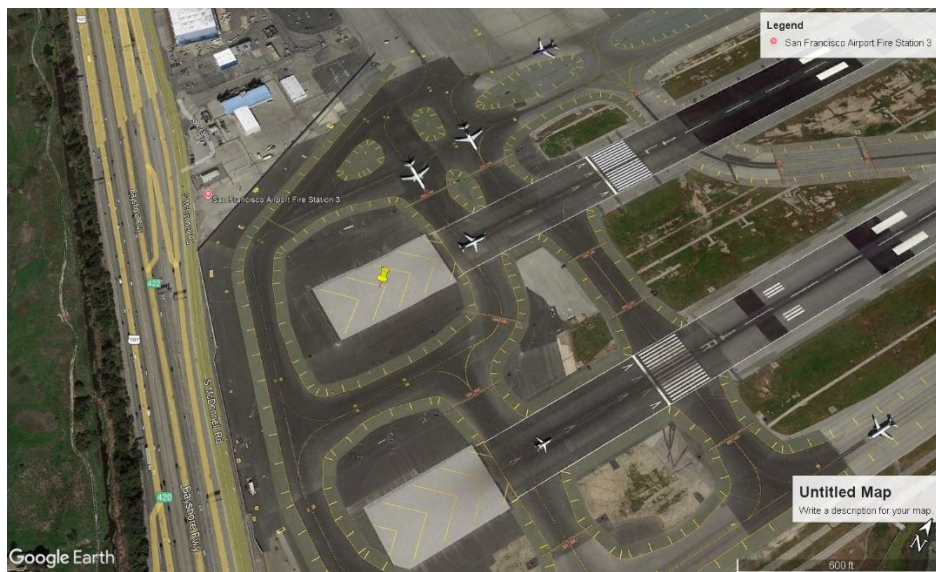

Runway 1L end – Year 2015
